# Supplementary material
Source: PubMed Central journal article supplement (PMC5425373)
Supplement: 12192_2017_786_MOESM2_ESM.pdf [file 12192_2017_786_MOESM2_ESM.pdf]

## ESM 2:

# Effects of Piperine in an in vitro model of DTT-induced ER Stress in NRK-52E cells

Hammad et al. 2017

**DTT-induced ER Stress Model:** Following 24 h pretreatment of NRK-52E cells with Piperine (250 and 500 nM), cells were exposed to 5 mM DTT for 5 hours. Cells were then washed and replenished with fresh media and incubated for 19 hours in 37°C. At the endpoint, cell viability was assessed using Alamar blue assay, and the cell lysates were collected for western blotting to probe for ER stress markers – GRP78 and CHOP.

# GRP78 Expression

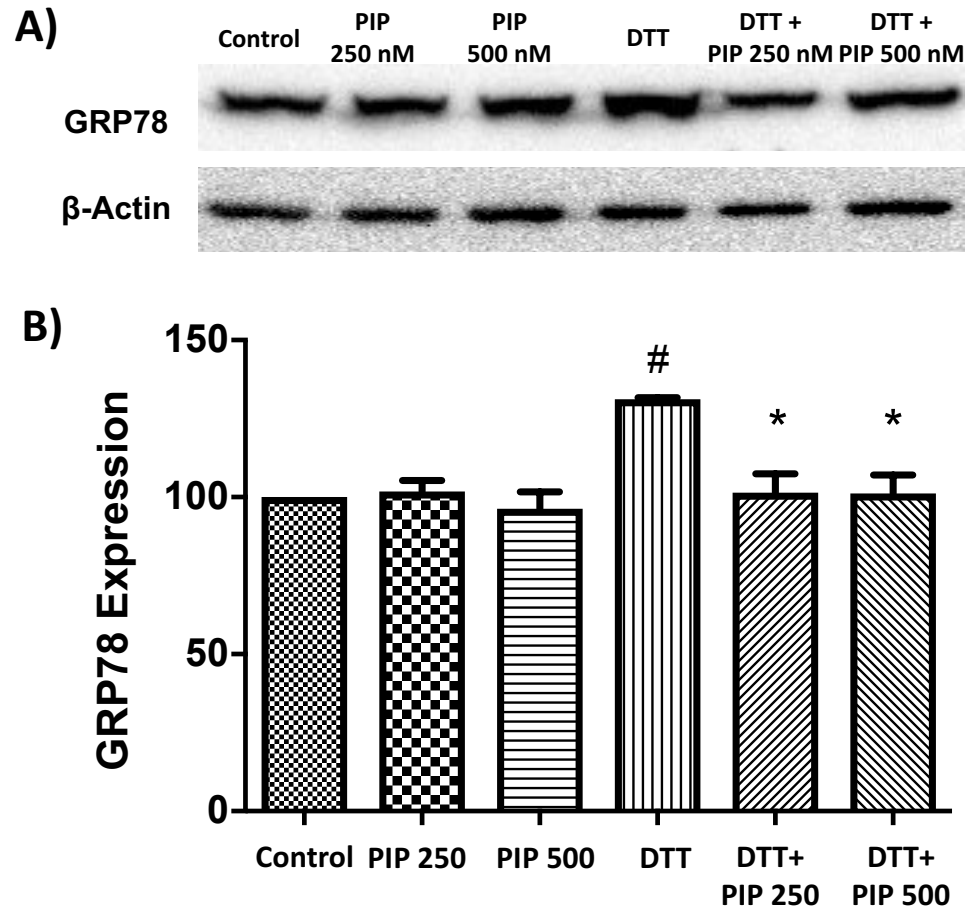

**Figure 1:** Effect of Piperine on DTT-induced expression of GRP78 in NRK-52E cells as determined by western blotting (A) and quantified using densitometry (B). Values were normalized using  $\beta$ -actin and expressed as percentage of vehicle-treated control (Mean  $\pm$  SEM;  $n = 3$ ). # $P < 0.05$  compared to Vehicle-treated control group; \* $P < 0.05$  compared to DTT-treated group

# CHOP Expression

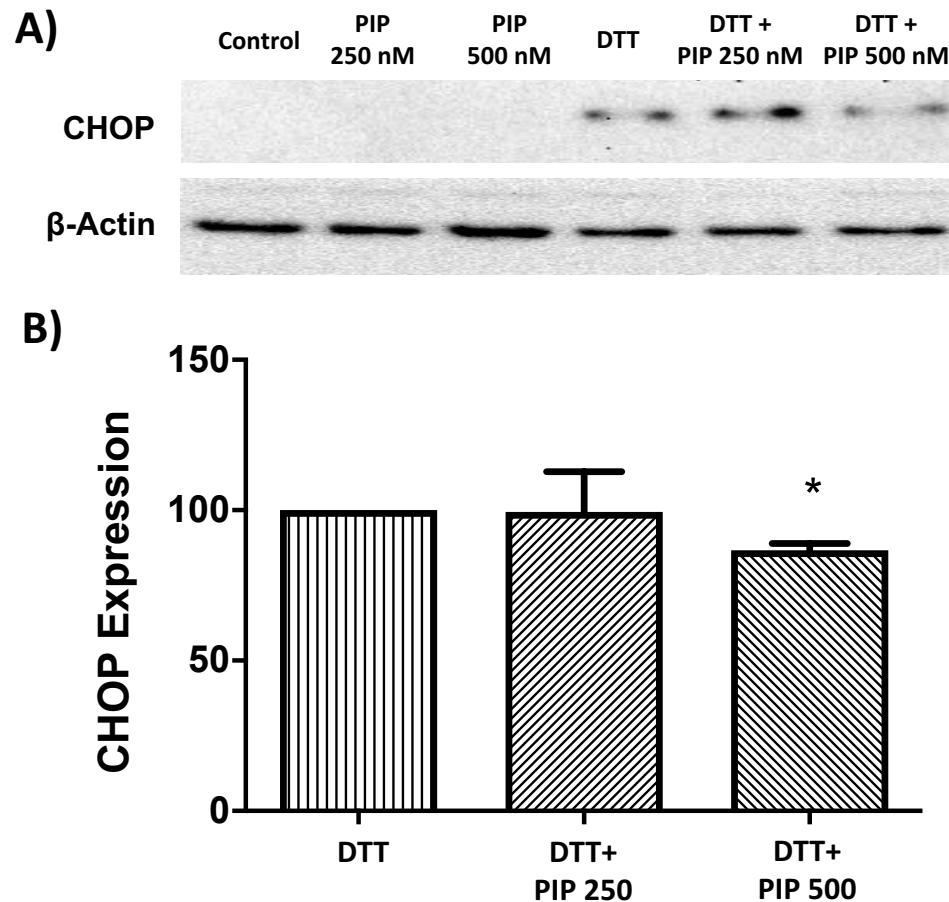

**Figure 2:** Effect of Piperine on DTT-induced expression of CHOP in NRK-52E cells as determined by western blotting (A) and quantified using densitometry (B). Values were normalized using  $\beta$ -actin and expressed as percentage of DTT-treated group (Mean  $\pm$  SEM;  $n = 3$ ). \* $P < 0.05$  compared to DTT-treated group

# Cell Viability - Alamar blue assay

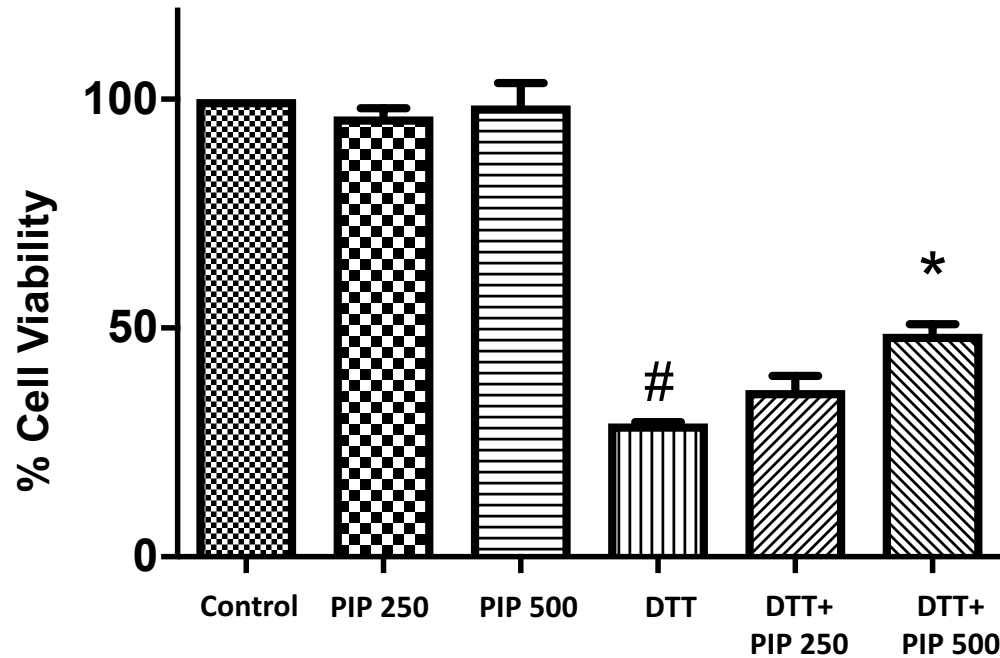

**Figure 3:** Effect of Piperine on DTT-induced loss of cell viability (measured by Alamar blue assay) in NRK-52E cells. Fluorescence values were normalized to vehicle-treated control and expressed as Mean  $\pm$  SEM ( $n = 4$ ). # $P < 0.05$  compared to vehicle-treated control group.
